1 The mammalian forelimb diversity as a morphological gradient of increasing evolutionary  
2 versatility

3

4 Priscila S. Rothier <sup>1\*</sup>, Anne-Claire Fabre<sup>2,3,4</sup>, Julien Clavel<sup>4,5</sup>, Roger Benson<sup>6</sup>, Anthony Herrel<sup>1</sup>

5

6 <sup>1</sup> Département Adaptations du Vivant, Muséum National d'Histoire Naturelle, Paris, France ;

7 <sup>2</sup> Naturhistorisches Museum Bern, 3005 Bern, Switzerland;

8 <sup>3</sup> Institute of Ecology and Evolution, University of Bern, 3012 Bern, Switzerland;

9 <sup>4</sup> Life Sciences Department, Vertebrates Division, Natural History Museum, London SW7 5BD,

10 United Kingdom;

11 <sup>5</sup> Univ. Lyon, Université Claude Bernard Lyon 1, CNRS, ENTPE, UMR 5023 LEHNA, F-69622,

12 Villeurbanne, France

13 <sup>6</sup> Department of Earth Sciences, University of Oxford, Oxford, UK

14

15 \* Corresponding author: [priscilasrd@gmail.com](mailto:priscilasrd@gmail.com)

16

17 Classification: Biological Sciences, Evolution

18

19 Keywords: Integration, macroevolution, phenotypic variation, autopod, osteology

20

21 7532 words, 1 table, 3 figures, 2 files containing supplementary material

22

23

24

## 25 **Abstract**

26 Vertebrate limb morphology often reflects the environment, due to variation in locomotor  
27 requirements and other ecological traits. However, proximal and distal limb segments may evolve  
28 differently to each other, reflecting an anatomical gradient of functional specialization that has  
29 been suggested to be impacted by the timing of bone condensation during ontogeny. Here we  
30 explore whether the temporal sequence of bone condensation predicts variation in the capacity of  
31 evolution to generate morphological diversity between proximal and distal forelimb segments  
32 across more than 600 species of mammals. Our findings are consistent with the hypothesis that  
33 late developing distal limb elements should display greater morphological variation than more  
34 proximal limb elements, which condense earlier during morphogenesis. Distal limb elements,  
35 belonging to the autopod, not only exhibit higher diversity of form, but are also more integrated  
36 and, on average, show greater evolutionary versatility than intermediate and upper limb  
37 segments. Our findings indicate that the macroevolutionary patterns of proximal and distal limb  
38 segments are not the same, suggesting that strong functional selection, combined with the higher  
39 potential of development to generate variation in more distal limb structures, facilitate the  
40 evolution of high autopodial disparity in mammals.

41

## 42 **Introduction**

43 The evolutionary origin of limbs marks the onset of the adaptive radiation of Tetrapoda (Shubin  
44 et al., 1997). From delicate wings to powerful excavating claws, from slender hooved legs to  
45 wide flattened flippers, limb formation is intrinsically integrated with and constrained by the  
46 determination of the tetrapod body plan (Raff, 1996). The tetrapod limb is typically composed of  
47 three basic components: the proximal stylopod (upper arm and thigh), the intermediate zeugopod  
48 (lower arm and calf), and the distal autopod (hand and foot). The proximal to distal organization

49 of segments is correlated with their respective evolutionary appearance, the stylopod being the  
50 first structure to evolve, later followed by the zeugopod, and finally the autopod (Shubin et al.,  
51 1997). Although the three-segment pattern is conserved among quadruped tetrapods, the  
52 morphology of these structures along the proximo-distal axis may evolve differently among  
53 groups (Cooper et al., 2011; Galis et al., 2001; Holder, 1983; Sears et al., 2007).

54 Mammalian limbs are often studied for their exceptional morphological and ecological  
55 diversity, particularly in the forelimbs (see Figure 1; e.g., Polly 2007; Chen and Wilson 2015;  
56 Weaver and Grossnickle 2020; Howenstine et al. 2021; Lungmus and Angielczyk 2021). The  
57 forelimb is present in all mammal species and is typically more variable than the hind limb,  
58 possibly due to its greater number of functional roles (e.g., Polly, 2007; Schmidt and Fischer,  
59 2009). In mammalian adult morphologies, the meristic composition of forelimb segments varies  
60 along the proximo-distal limb axis, where the autopod exhibits most of the diversity in terms of  
61 the number and position of skeletal elements (i.e., fusion and loss of carpal and tarsal bones and  
62 alteration of the phalangeal formula; Cooper et al., 2007; Hamrick, 2001; Holder, 1983; Luo et  
63 al., 2015; Saxena et al., 2017). In contrast, structures from the proximal segments are always  
64 present in the mammalian forelimb, displaying some but less frequent cases of element reduction  
65 and partial fusion of the zeugopod bones (observed in bats, manatees, horses, etc., Holder, 1983;  
66 Sears et al., 2017, 2007). Although this meristic information is useful to quantify major  
67 evolutionary changes in element composition, most of the morphological variation observed in  
68 mammalian limbs results from changes in the shapes and relative sizes of individual elements  
69 (i.e. variation of form) without changing the numbers of elements, and is often associated with  
70 functional adaptation (Fabre et al., 2013, 2015; Janis & Martín-Serra, 2020; Lungmus &  
71 Angielczyk, 2021; Sears et al., 2017). Despite its importance, it remains unclear how the  
72 variation of form is partitioned between more proximal and distal skeletal elements.

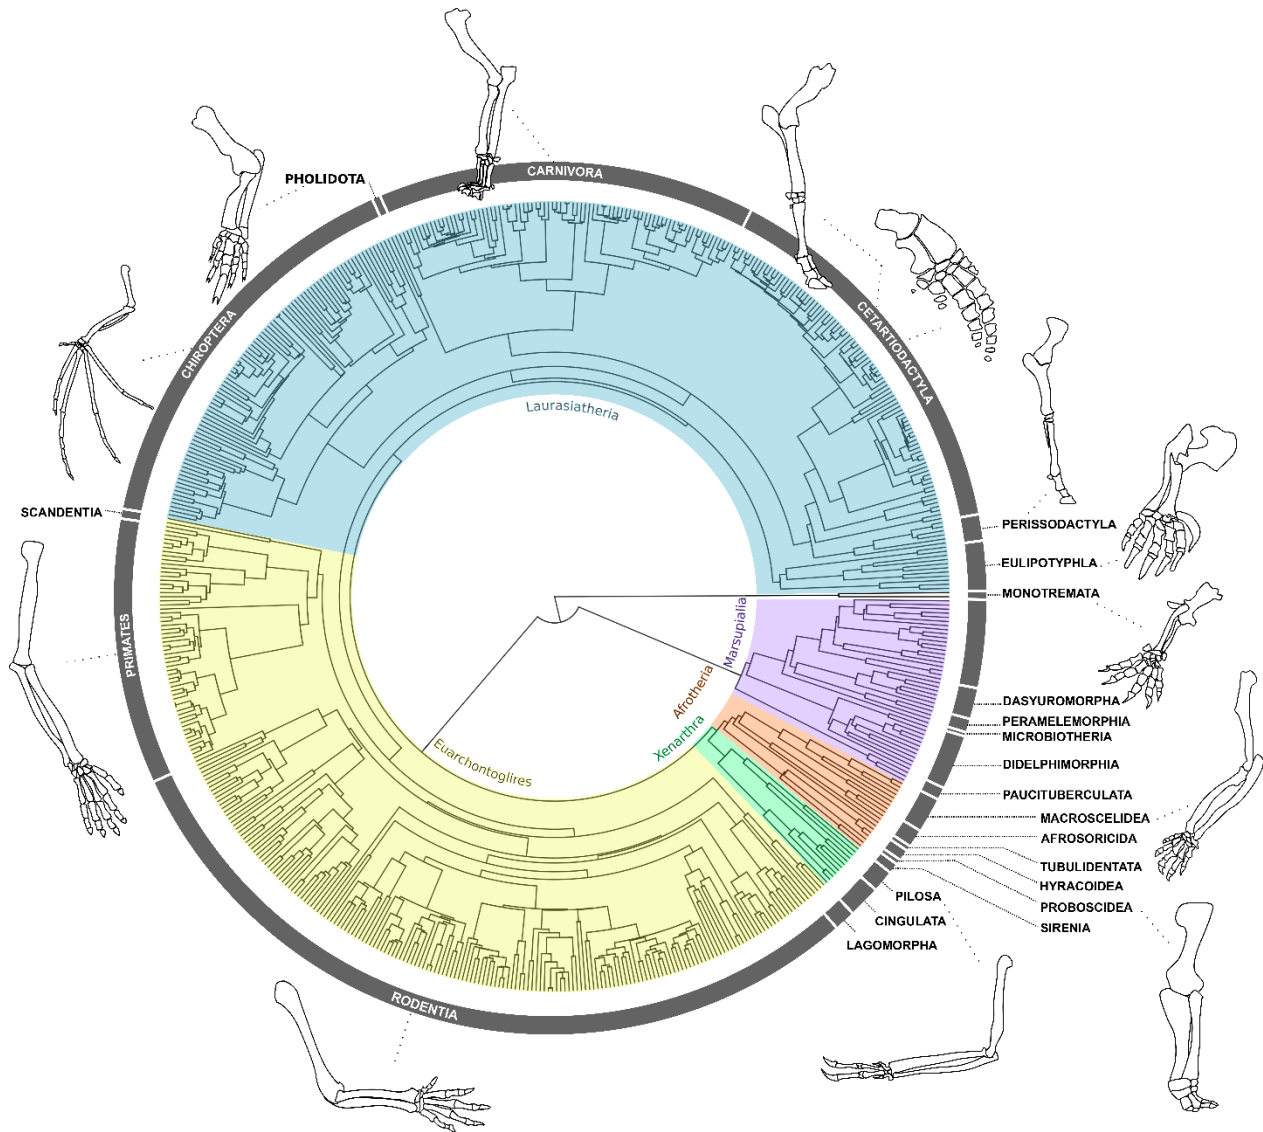

73  
74 **Figure 1. Forelimb diversity of mammals.** The topology includes all genera examined in this  
75 work, representing the outstanding forelimb morphological variation for some of the species  
76 analysed. The topology was estimated using maximum clade credibility from a posterior sample  
77 of 10,000 trees published by Upham et al. (2019).

78  
79 Both functional and developmental factors may predict that distal elements should show  
80 greater variation of form than more proximal elements. Developmental mechanisms predict this  
81 pattern due to the timing and spatial pattern of morphogenesis. Each limb initiates as a bud that

82 extends from the body wall, where skeletal elements are generally specified in a proximal to  
83 distal sequence that matches to their evolutionary appearance during tetrapod origins:  
84 development begins with the stylopod, followed by the zeugopod, and terminating in the autopod  
85 at the distal end (Schneider and Shubin, 2013; Shubin et al., 1997; Stopper and Wagner, 2005).  
86 Studies of mammals have revealed that different species have more similar forelimb morphology  
87 during early development, and become more disparate during later stages of morphogenesis  
88 (Ross et al., 2013). Likewise, gene expression is more conserved during early phases of limb  
89 development, compared to later phases (Maier et al., 2017). This has been shown for species with  
90 dramatically different adult limb morphologies: bats, pigs, opossums and mice (Maier et al.,  
91 2017), and these patterns might reflect the intrinsic temporal properties of embryogenesis (Galis  
92 et al., 2001; Maier et al., 2017; Sears et al., 2017). Specifically, early developmental processes  
93 mediating the initial specification of structures are generally more constrained than those  
94 governing later events, such as organ specialization (Kalinka and Tomancak, 2012). Therefore,  
95 because limb development proceeds proximo-to-distally, developmental perturbations at later  
96 phases may tend to accumulate higher morphological variation in distal elements (Hallgrímsson  
97 et al., 2002).

98         One way to infer the levels of developmental and functional constraints on adult  
99 morphologies is by quantifying the phenotypic integration among traits, inferred from the  
100 covariation between structures. Because the fore and hind limbs are serially homologous  
101 elements, they share genetic and developmental processes that give rise to strong phenotypic  
102 integration between and within the limbs (Ruvinsky and Gibson-Brown, 2000; Young and  
103 Hallgrímsson, 2005). The correlation between homologous limb segments of the fore- and  
104 hindlimbs (i.e., humerus with femur, radius with tibia, metacarpal with metatarsal) has been  
105 described for some mammalian groups, suggesting that proximal segments are highly integrated

106 to each other (Hallgrímsson et al., 2002; Schmidt and Fischer, 2009; Young and Hallgrímsson,  
107 2005). In contrast, more distal elements, of the hand and foot show more variable patterns of  
108 integration, which may reflect the accumulation of variation during later phases of development  
109 (Hallgrímsson et al., 2002; Rolian, 2009; Young and Hallgrímsson, 2005). Furthermore, because  
110 the autopod is the structure that interacts directly with the substrate, this limb segment is likely to  
111 experience more dynamic selective pressures favouring locomotor specialization in certain  
112 environments compared to proximal segments. A consequence for limb evolution is that the  
113 patterns and pace of morphological evolution might not be the same between proximal and distal  
114 segments.

115 Here, we investigate the evolutionary patterns underlying the morphological  
116 diversification of mammalian forelimb segments along a proximal-to-distal axis, using a  
117 comprehensive data set of 638 species, capturing over 85% of Mammalia family-level diversity  
118 (Table S1 of SI 1). We ask to what extent is the temporal structure of proximo-distal bone  
119 condensation consistent with the macroevolution of limb segment morphologies. We examined  
120 the diversification of limb skeletal elements by quantifying morphological diversity and  
121 integration using linear measurements of four forelimb bones (Figure 2, Table S2 of SI 2). We  
122 also estimated the macroevolutionary patterns of these elements using multivariate phylogenetic  
123 comparative models. First, we quantified the morphological diversity of each segment, testing the  
124 hypothesis that distal bones are morphologically more diverse than the proximal structures. Next,  
125 we investigated whether the strength of within-segment integration differs between proximo and  
126 distal limb elements. We predicted that proximal elements would be more integrated than distal  
127 ones, due to their earlier condensation during development. Finally, we inferred the  
128 macroevolutionary patterns for bones belonging to all limb segments, predicting positive  
129 associations between the temporal sequence of bone condensation and the capacity for evolution

130 to generate morphological diversity. To our knowledge, this is the first time that the evolutionary  
131 patterns observed in the form of proximal versus distal limb elements are investigated using a  
132 broad phylogenetic and ecological sample of mammalian diversity, essential to address these  
133 questions.  
134

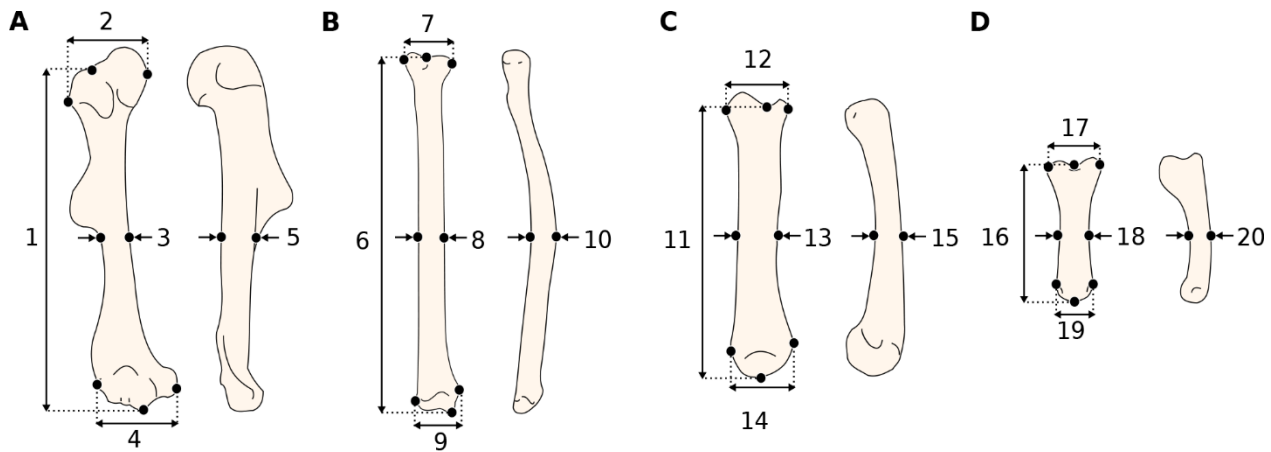

135  
136 **Figure 2. Representation of the linear measurements obtained of the forelimb elements. A)**  
137 Humerus in anterior (right) and lateral (left) view: 1) length, 2) proximal width, 3) mid-shaft  
138 width, 4) distal width and 5) height. **B)** Radius in anterior (right) and lateral (left) view: 6) length,  
139 7) proximal width, 8) mid-shaft width, 9) distal width and 10) height. **C)** Third metacarpal in  
140 dorsal (right) and lateral (left) view: 11) length, 12) proximal width, 13) mid-shaft width, 14)  
141 distal width and 15) height. **D)** First phalanx of the digit III in dorsal (right) and lateral (left)  
142 view: 16) length, 17) proximal width, 18) mid-shaft width, 19) distal width and 20) height.

143 Detailed description of each measurement can be found in Table S2.

144

## 145 **Results**

146 The evolutionary model that better predicts the pattern of evolution for all bones measured is the  
147 Ornstein-Uhlenbeck (OU) process (Table S3 of SI 2). Therefore, we simulated trait evolution

148 under an OU process on 100 datasets in order to account for error and obtain the results described  
149 below.

150

### 151 ***Morphological diversity***

152 We inferred morphological diversity for each bone using the determinant and the trace of the  
153 simulated trait matrices. Determinants and traces of matrices offer different but complementary  
154 generalized metrics to describe the variation of multidimensional data. The matrix trace provides  
155 information about the accumulated trait variance, whereas the determinant provides information  
156 about the volume occupied by the multivariate data. Both show similar patterns, in which  
157 morphological variation increases along the proximo-distal axis, consistent with the timing of  
158 limb condensation during development (Figure 3A and B). The early-condensing humerus is the  
159 least variable structure, and the late-condensing phalanx is the most diverse element measured,  
160 followed by the third metacarpal. All pairwise comparisons between elements are significant  
161 (Table 1), although the differences of the determinant distributions of the radius and the  
162 metacarpal ( $P = 0.017$ ) are smaller than when using the trace results ( $P < 0.001$ ).

163

### 164 ***Phenotypic integration***

165 Integration, inferred here by the values of eigenvalue dispersion, is stronger for distal elements  
166 compared to proximal ones, the phalanx being the most integrated element, followed by the  
167 metacarpal (Figure 3 A and C). The values of integration do not progressively increase along the  
168 proximo-distal axis. Instead, the radius is the least integrated structure, and the more proximal  
169 humerus is the second least integrated trait. All pairwise comparisons between elements are  
170 significant (Table 1).

171



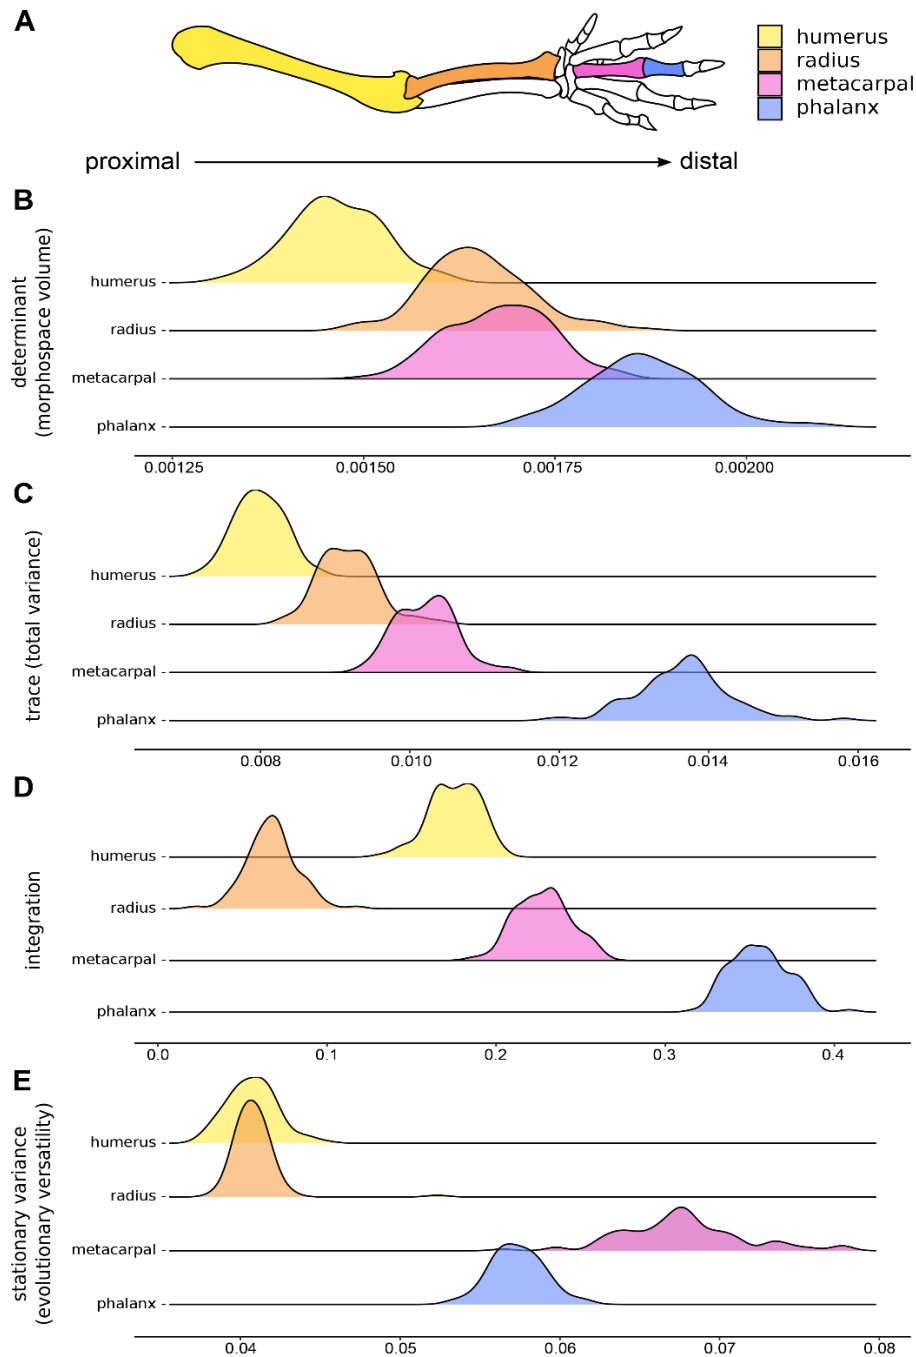

172

173 **Figure 3. Components of the morphological evolution of forelimb skeletal elements. A)**

174 Forelimb schematic, with colours indicating bones along the proximo-distal axis: the humerus

175 (yellow), radius (orange), third metacarpal (pink), and the first phalanx of digit III (blue). **B)**

176 Morphological diversity of limb bones inferred by matrix determinant. **C)** Morphological

177 diversity of limb bones, inferred by matrix trace. **D)** Trait integration. **E)** Stationary variance.

178 **Table 1. Limb bone pairwise comparison of integration, determinant, trace and stationary**  
 179 **variation computed by Tukey Test.** Pairwise differences (Diff) of each metric are indicated with  
 180 the lower (Lwr) and upper (Upr) 95% CI, as well as the adjusted P-values. Hum= Humerus, Rad=  
 181 Radius, Met= Metacarpus and Phal= Phalanx.

|                            |         | <b>Rad-Hum</b>   | <b>Met-Hum</b>   | <b>Phal-Hum</b>  | <b>Met-Rad</b>   | <b>Phal-Rad</b>  | <b>Phal-Met</b>  |
|----------------------------|---------|------------------|------------------|------------------|------------------|------------------|------------------|
| <b>Determinant</b>         | Diff    | 1.8E-04          | 2.1E-04          | 4.0E-04          | 2.9E-05          | 2.2E-04          | 1.9E-04          |
|                            | Lwr     | 1.6E-04          | 1.9E-04          | 3.8E-04          | 3.8E-06          | 1.9E-04          | 1.6E-04          |
|                            | Upr     | 2.1E-04          | 2.4E-04          | 4.3E-04          | 5.3E-05          | 2.4E-04          | 2.1E-04          |
|                            | P-value | <b>&lt;0.001</b> | <b>&lt;0.001</b> | <b>&lt;0.001</b> | <b>0.017</b>     | <b>&lt;0.001</b> | <b>&lt;0.001</b> |
| <b>Trace</b>               | Diff    | 1.2E-03          | 2.2E-03          | 5.7E-03          | 1.0E-03          | 4.5E-03          | 3.4E-03          |
|                            | Lwr     | 1.0E-03          | 2.1E-03          | 5.5E-03          | 8.8E-04          | 4.3E-03          | 3.3E-03          |
|                            | Upr     | 1.4E-03          | 2.4E-03          | 5.8E-03          | 1.2E-03          | 4.6E-03          | 3.6E-03          |
|                            | P-value | <b>&lt;0.001</b> | <b>&lt;0.001</b> | <b>&lt;0.001</b> | <b>&lt;0.001</b> | <b>&lt;0.001</b> | <b>&lt;0.001</b> |
| <b>Integration</b>         | Diff    | -0.108           | 0.052            | 0.180            | 0.160            | 0.288            | 0.128            |
|                            | Lwr     | -0.114           | 0.047            | 0.175            | 0.155            | 0.283            | 0.122            |
|                            | Upr     | -0.102           | 0.058            | 0.186            | 0.166            | 0.294            | 0.133            |
|                            | P-value | <b>&lt;0.001</b> | <b>&lt;0.001</b> | <b>&lt;0.001</b> | <b>&lt;0.001</b> | <b>&lt;0.001</b> | <b>&lt;0.001</b> |
| <b>Stationary variance</b> | Diff    | 0.000            | 0.027            | 0.017            | 0.027            | 0.017            | -0.010           |
|                            | Lwr     | -0.001           | 0.026            | 0.016            | 0.026            | 0.016            | -0.011           |
|                            | Upr     | 0.001            | 0.028            | 0.017            | 0.028            | 0.017            | -0.009           |
|                            | P-value | 0.989            | <b>&lt;0.001</b> | <b>&lt;0.001</b> | <b>&lt;0.001</b> | <b>&lt;0.001</b> | <b>&lt;0.001</b> |

182

183

184 ***Stationary variances***

185 Traits evolving under an OU process exhibit attraction ( $\alpha$ ) towards their respective adaptive  
 186 optima ( $\theta$ ). Therefore, we interpreted the tempo of evolution of traits considering the mean  
 187 stationary variance of each bone, which represents the expected variation when the process is in  
 188 equilibrium and summarizes the relative influence of stochastic factors in evolution (see  
 189 Friedman et al., 2021; Gearty et al., 2018; Hansen, 1997; Joly et al., 2018). The stationary  
 190 variances are significantly higher for distal elements compared to proximal ones. The metacarpal  
 191 shows the highest stationary variance, followed by the phalanx (Figure 3 A and D). There are no

192 significant differences in the stationary variances at which the humerus and the radius evolve,  
193 these values being significantly lower than those of the two autopod elements (Table 2).

194

## 195 **Discussion**

196 The remarkable diversity of limb morphologies seen in mammals reflects the rich ecological and  
197 functional diversity that has evolved in this group (Polly, 2007). However, such outstanding  
198 morphological diversity does not evolve uniformly among all limb segments. Here, we show a  
199 general pattern of limb diversity in Mammalia in which distal elements such as phalanges and  
200 metacarpals are in general more disparate and show greater evolutionary versatility than more  
201 proximal elements such as the humerus and radius. Our results are consistent with the hypothesis  
202 that the timing of element condensation during development regulates the outcomes of  
203 morphological evolution. We show that morphological diversity increases along the proximo-  
204 distal axis with the phalanx being the most variable structure in the mammalian limb, and the  
205 humerus being the least diverse element. Conversely, developmental constraints imposed by early  
206 versus late development do not seem to determine segment integration; we found that the latest-  
207 condensing elements, in the hand, are more integrated than the earlier-condensing humerus and  
208 radius. We further show that distal elements evolve, on average, with greater stationary variances  
209 than the proximal limb elements. Although we did not find a correspondence of temporal  
210 developmental constraints with the integration of structures, the latter do seem to play an  
211 important role in morphological diversification.

212

213 *Timing of condensation explains the outcome of morphological diversity but not the*  
214 *integration of limb elements*

215 Developmental constraints consist of intrinsic components of the developmental system that may  
216 bias the production of phenotypic variability (Wagner, 1988). Consequently, strong constraints  
217 have the potential to canalize or restrict the array of phenotypes upon which natural selection can  
218 act on, ultimately influencing the course of morphological evolution (Raff, 1996). We here  
219 describe a generalized pattern of limb evolution in mammals, in which variation of form  
220 increases gradually along the proximo-distal axis. This pattern is consistent with the prediction  
221 that lower proximal diversity might be driven by developmental canalization (Hallgrímsson et al.,  
222 2002), which, if true, suggests that intrinsic and strong developmental influences on forelimb  
223 evolution are shared across Mammalia. Although previous studies have described the outstanding  
224 meristic variation in the autopod in contrast with the proximal and intermediate limb (Holder,  
225 1983), here we confirm that such diversity is also detected in the form of hand bones.

226         The evolutionary variation in development has been proposed as a major determinant of  
227 morphological diversity between clades (Cheverud, 1984; Hall, 2012; Wagner, 1988; Watson et  
228 al., 2014). Marsupials exhibit less morphological diversity when compared to placentals, for  
229 example, they have never evolved fully aquatic life-styles or performing active flight (as whales  
230 and bats, respectively). One hypothesised explanation refers to developmental constraints.  
231 Specifically, marsupials are born without being fully developed and need to move from the uterus  
232 to the mother's teat using their forelimbs (Gemmell et al., 2002). An alternative explanation has  
233 also been proposed, in which marsupials also had less biogeographical opportunity to diversify  
234 into as many ecological niches as placentals (Sánchez-Villagra, 2013). Developmental  
235 constraints, ecological limitations, or both in combination therefore are believed to have  
236 restricted not only the morphological diversity of the forelimbs of marsupials, but also of their  
237 skulls and the jaws (Bennett and Goswami, 2013; Cooper and Stepan, 2010; Fabre et al., 2021;

238 Pevsner et al., 2022; Sánchez-Villagra, 2013; Sears, 2004). Likewise, the within-species variation  
239 of forelimb morphology is more integrated in some marsupial species compared to placentals,  
240 possibly also reflecting developmental restrictions on these traits in marsupials (Bennett and  
241 Goswami, 2011; Kelly and Sears, 2011). Contrary to the expectations of our developmental  
242 hypothesis here, however, integration is not greater in early-condensing segments across  
243 mammals, but rather is stronger in the later formed metacarpals and phalanges.

244         The high integration detected in the mammalian hand may reflect the evolutionary  
245 modularization of the autopod relative to the proximal limb. This may result from the  
246 developmental origin of the autopod, which develops from a conserved module that patterns the  
247 relative sizes of phalanges in a range of proportions from a nearly equal-sized pattern to a large-  
248 to-small gradient among adult individuals (Kavanagh et al., 2013; Young et al., 2015). Such  
249 patterns reflect the dynamic and modular characteristic of limb development, implying that  
250 although segments share underlying genetic networks, each bone is mediated by unique markers  
251 that attribute their own developmental identity (Cooper et al., 2011; Petit et al., 2017; Schneider  
252 and Shubin, 2013; Tanaka, 2016). The modular nature of the limbs likely also explains the  
253 occurrence of strong evolutionary integration between anterior and posterior homologous  
254 segments, especially in quadrupedal species whose fore- and hind limbs perform similar  
255 functions (Botton-Divet et al., 2018; Martín-Serra et al., 2015; Schmidt and Fischer, 2009; Young  
256 and Hallgrímsson, 2005). For instance, a reduction in the covariation between homologous  
257 regions is observed in the presence of locomotor specialization (Hanot et al., 2017; Martín-Serra  
258 et al., 2015; Schmidt and Fischer, 2009; Young and Hallgrímsson, 2005). In bats, for example, the  
259 specialization of the forelimb for flight explains the weak degree of integration between anterior  
260 and posterior segments, but a high signal of modularity is detectable among elements belonging

261 to the same limb (Young and Hallgrímsson, 2005). The evolutionary divergence of fore- and  
262 hindlimb morphologies also involves the divergence of their genetic and developmental factors  
263 (Cooper et al., 2012; Farnum et al., 2007), providing relative modularization of hands from feet.  
264 On average, we found a strong integration in hand bones of mammals that may reflect such  
265 strong modularization of the anterior autopod shared by some taxa. Ultimately, the  
266 modularization of the autopod might have facilitated the evolution of functionally specialized  
267 traits in mammals. A detailed investigation of how limb integration manifests between clades  
268 might elucidate if such patterns are more evident in some groups than others.

269         The relationship between integration and morphological variation is not always consistent  
270 among traits and taxa (Felice et al., 2018). Whereas some studies have shown clear positive  
271 associations between high integration and phenotypic variation (Fabre et al., 2021, 2020; Randau  
272 and Goswami, 2017), negative associations have been also reported (Felice and Goswami, 2018;  
273 Goswami and Polly, 2010). We find no evidence for a strong correspondence of integration with  
274 morphological diversity in proximal forelimb segments: the radius exhibits greater diversity of  
275 form than the humerus, but presents the weakest values of integration among the bones measured.  
276 For the distal elements, however, our results show that the highly integrated autopod, especially  
277 the phalanx, also corresponds to the most diverse structure of the limb. These differences might  
278 reflect how selection interacts with the intrinsic constraints of variation. Though integration may  
279 constrain the evolution of the phenotype to a limited portion of morphospace, it may also  
280 promote variation by driving the evolution of these traits in response to selection for functional  
281 specialization (Felice et al., 2018; Goswami et al., 2014; Hansen and Houle, 2008; Lande, 1979).  
282 Such dynamics appear to be observed in distal elements: high integration in the phalanx and  
283 metacarpus, possibly favoured the evolution of functionally specialized autopod structures,

284 contributing to the high variation observed in mammalian hand bones. Future studies will benefit  
285 from including extinct taxa, based on fossils, to understand how morphological diversity and  
286 integration of limb bones evolved in the deep time, whether these patterns are consistent between  
287 major taxonomic and ecological groups and through time, and when they first appeared during  
288 mammalian ancestry.

289

### 290 *Evolution of the autopodal elements: functional associations*

291 Functional variation is often a good predictor of the morphological variation of limb bones (Chen  
292 and Wilson, 2015; Fabre et al., 2013; Grossnickle et al., 2020; Weaver and Grossnickle, 2020).

293 Although the distal portion has been suggested to be the most variable structure of the limb, few  
294 studies have quantified the functional relationships driving autopod variation in mammals

295 (Almécija et al., 2015; Rolian, 2009; Weisbecker and Schmid, 2007; Weisbecker and Warton,  
296 2006). The hand interacts directly with the surrounding environment, performing important

297 activities such as providing support to the body during locomotion and, in some cases, digging,  
298 handling food, grooming and mediating social interactions (Biewener and Patek, 2003; McGrew

299 et al., 2001; Naghizadeh et al., 2020; Weisbecker and Warton, 2006). In our study, we show that

300 the autopod is not only the limb segment showing the highest variation in form, but also that it

301 evolves, on average, with greater stationary variances around their optima than the stylopod and

302 the zeugopod. We suggest that strong functional selection (resulting from the direct impact

303 autopod structures on locomotor performance) combined with the higher potential of

304 development to generate variation in the morphology of more distal limb elements, facilitate the

305 evolution of high autopodial disparity in response to varying environmental demands across

306 mammals.

307           Examples of autopodial specialisation are widespread among mammals. For example,  
308 notable transformations in the metacarpal and phalangeal morphology are observed in cursorial  
309 taxa that present specializations allowing for endurance running, typically involving the  
310 elongation of the distal limb in relation to proximal segments (Polly, 2007). Morphological  
311 adaptations to cursoriality mostly encompass the modification of autopod posture to digitigrady  
312 (animals that stand on the distal ends of metapodials and middle phalanges, such as cats and  
313 dogs) and unguligrady (animals that stand on their hooved distal-most phalanx, such as horses  
314 and cows; Clifford, 2010; Polly, 2007; Wang, 1993). Digitigrady is observed in many carnivorans  
315 providing limb elongation and thus increasing stride length (Polly, 2007; Wang, 1993). Extant  
316 horses exhibit one of the most dramatic modifications of the third metapodial and phalanges  
317 among all unguligrade taxa: the limb is uniquely supported by the third toe, which is considerably  
318 enlarged and elongated, whilst the lateral fingers are markedly reduced (McHorse et al., 2019).  
319 One recent study suggested that the evolutionary transitions in foot and hand postures are  
320 associated with strong selection for rapid changes in increasing body size (Kubo et al., 2019).  
321 Although a digital posture presumably implies morphofunctional specialization of the distal limb,  
322 it is not clear if the acceleration of body mass evolution during autopod posture transitions has  
323 also affected the rates of morphological change of the hand and foot. Autopodial specialisations  
324 are also evident among smaller-sized mammals. For example, body size is positively associated  
325 with the tempo of evolution of postcranial morphology (hand and foot bones included) in both  
326 ground and tree dwelling animals, where medium-sized animals tend to exhibit higher stationary  
327 variances than small-sized species(Weaver and Grossnickle, 2020). Nevertheless, in both cases,  
328 functional specializations related to the locomotion likely played a role on driving the  
329 morphological evolution of the limb, potentially involved with the accelerated evolution of hand



330 bone morphologies. Further investigations are needed to better understand the associations of  
331 functional variation with the evolutionary dynamics of limb diversification.

332

### 333 ***Conclusion***

334 This study uses a macroevolutionary framework to compare, for the first time, the general  
335 patterns of form diversification of proximal and distal limb elements in mammals. Our results  
336 reveal that the evolution of the mammalian forelimb involves different patterns of morphological  
337 diversification when comparing limb segments along a proximal–distal gradient. We detected that  
338 the diversification of autopodial elements was much more dynamic than those of the zeugopod  
339 and stylopod, involving higher morphological diversity, stronger integration and greater  
340 evolutionary versatility at distal structures. Specifically, we corroborate the premise that the late-  
341 condensing distal elements such as metacarpals and phalanges (in the autopod) exhibit higher  
342 morphological diversity than early-condensing, more proximal, elements. This pattern might  
343 emerge from different levels of constraints during the developmental succession. However, such  
344 temporal constraints of development do not explain the patterns of limb evolution alone, as  
345 functional specializations may also play an important role on form diversification. Particularly,  
346 strong integration at autopod elements might reflect the modularization of hand structures in  
347 response to a plethora of functional demands. We highlight the importance of considering known  
348 variation during the development to understand the macroevolutionary outcome of adult  
349 morphologies and we hope that these results will contribute to better understand the association  
350 of limb segment variation with ecological diversity.

351

### 352 **Material and Methods**

#### 353 ***Taxonomic sampling and data acquisition***

354 We sampled 638 species of mammals (670 specimens), representing 598 genera of 138 living  
355 families (Figure 1). Sampling varies from one to four individuals per genus. We provided micro-  
356 CT-scans and surface scans of 58 small to medium sized-specimens from different institutions  
357 (available online at MorphoSource.org, Table S1 from SI 1), 23 of them previously used by  
358 Martín-Serra and Benson 2020. The digital dataset was combined with 351 meshes available on  
359 MorphoSource.org (Table S1 from SI 1). Image stacks were converted into three-dimensional  
360 models using Avizo 8.1.1 (1995-2014 Zuse Institute Berlin), where scale dimensions were  
361 incorporated based on the voxel size of each scan. Data collection from the digital models was  
362 also conducted in Avizo 8.1.1 (1995-2014 Zuse Institute Berlin). We complemented this dataset  
363 with measurements provided by caliper of 261 medium to large body-sized species from the  
364 mammal collection of the Muséum National d'Histoire Naturelle (Paris, France) (Table S1).

365 We measured 20 linear distances from anterior limb bones, including the humerus, the  
366 radius, the third metacarpal and the first phalanx of digit III. We acquired five measurements for  
367 each element: length, widths (proximal, mid-shaft and distal) and height (Figure 2, see detailed  
368 description in Table S2 from SI 2). We opted not to include the ulna because this bone is fused to  
369 the radius in many taxa (see Sears et al. 2007), preventing the acquisition of such measurements.  
370 The metacarpal and first phalanx of digit III were sampled because this is the only digit present in  
371 the hands of all mammalian lineages, even in groups that exhibit digit loss or fusion with other  
372 autopodial elements, such as in golden moles and ungulates (Clifford, 2010; McHorse et al.,  
373 2019; Prothero, 2009). Each individual was measured twice with the subsequent calculation of  
374 the mean and standard error in order to verify measurement error. Body mass estimates were  
375 assembled from the PanTHERIA database (Jones et al., 2009) and complemented by literature  
376 sources when necessary (Table S1 from SI 1). Species taxonomy followed the Mammal Diversity  
377 Database published by Burgin et al. (2018).

378 *Comparative analyses*

379 Analyses were implemented in R 4.1.2 (R Core Team, 2021). We used the phangorn R package  
380 (Schliep, 2011) to estimate a maximum clade credibility (MCC) tree from a posterior sample of  
381 10,000 trees published by Upham et al. (2019). Because the incorporation of some species was  
382 available only at the genus level, we pruned the MCC tree to genus level, according to the taxa  
383 sampled by our study.

384 Allometry generally explains most part of morphological variation, as body parts usually  
385 grow together, masking variation mediated by local development (Marroig, 2007; Raff, 1996).  
386 Because we are particularly interested in understanding morphological constraints imposed by the  
387 local development of the limb, we decided to remove the allometric component of our dataset in  
388 order to reduce variation associated with other sources of development. The genus means of each  
389 trait were scaled to size in a linear regression model. First, we transformed body mass into linear  
390 scale by taking the cube root prior to log<sub>10</sub>-transformation (Harmon et al., 2010). We calculated  
391 the geometric means of all measurements acquired, including the linear scaled body size, and  
392 then we fitted the log<sub>10</sub>-transformed trait means in a phylogenetic generalized least-squares  
393 (PGLS) using the geometric means as a predictor. We grouped the traits by bone and fitted the  
394 linear models for each skeletal unit with mvglms() function from mvMORPH R package (Clavel et  
395 al., 2019, 2015). We calculated the fit of three models of evolution using LASSO penalization:  
396 Brownian Motion (BM), Ornstein-Uhlenbeck (OU) and Early Burst (EB). We compared the  
397 likelihood of the model fits with Generalized Information Criterion (GIC).

398 The OU model of evolution had the best fit for all the linear regressions accounting for  
399 body mass using the MCC tree (Table S3 of SI 2). Thus, we simulated trait evolution under OU  
400 process on 100 datasets, in order to account for error and conduct the downstream analyses

401 (function mvSIM() from mvMORPH; Clavel et al. 2015, 2019). We repeated the body mass  
402 PGLS for the simulated data and calculated the residual covariance phylogenetic matrices.

403

#### 404 ***Morphological diversity and phenotypic integration***

405 Morphological diversity for each bone was interpreted as the values of the determinant and the  
406 trace of simulated matrices. We scaled the determinants by transforming their absolute value to  
407 the power of one divided by five, which is the number of dimensions of each matrix (that is, the  
408 number of measurements). Differences in the determinant and trace between skeletal elements  
409 were evaluated by ANOVA followed by Tukey Tests (function TukeyHSD() from stats R  
410 package) of the 95% confidence interval (CI).

411 We calculated the magnitude of integration for each bone separately, based on eigenvalue  
412 dispersion in their respective matrices. We transformed the simulated covariance matrices into  
413 correlation matrices and provided integration values as the standard deviation of eigenvalues  
414 relative to their theoretical maximum (Haber, 2011; Pavlicev et al., 2009). We calculated the  
415 integration as the dispersion of the standard deviation of eigenvalues of our trait matrices,  
416 following Pavlicev et al. (2009). For instance, highly integrated traits have most of the  
417 independent variance concentrated in the first few eigenvalues, while uncorrelated traits have the  
418 variance similarly distributed between eigenvalues (Pavlicev et al., 2009). Eigenvalue dispersion  
419 was inferred from CalcEigenVar() function of evolqg R package (Machado et al., 2019; Melo et  
420 al., 2015), which calculates the relative eigenvalue variance of the matrix as a ratio between the  
421 observed variance and the theoretical maximum for a matrix of the same size and trace (Machado  
422 et al. 2019). Differences between distributions were computed by an ANOVA and detailed by  
423 Tukey Tests of the 95% CI.

424

## 425 ***Macroevolutionary patterns***

426 To assess variability due to the tree topology and branching times, we replicated the body  
427 mass linear regressions with 100 trees from Upham et al. (2019). We fitted these linear  
428 regressions under OU process, which showed the best support in the previously described PGLS  
429 using the MCC tree, and estimated the average rates of evolution ( $\sigma^2$ ) per bone. Because OU is a  
430 stochastic process that models the evolution of traits towards an optimum  $\theta$  with an attraction  $\alpha$ ,  
431 we cannot disentangle the effects of  $\sigma^2$  and  $\alpha$  to understand the tempo of trait evolution (Hunt,  
432 2012). Therefore, we additionally calculated the mean stationary variance of bones ( $\sigma^2/2\alpha$ ) of OU  
433 fitted matrices in order to summarize the relative influence of stochastic factors in evolution  
434 (Friedman et al., 2021; Hansen, 1997). We compared their distributions using ANOVA followed  
435 by a 95% confidence interval Tukey Test.

436

## 437 **Data availability**

438 Data and codes will be made available on Dryad Digital Repository upon to manuscript  
439 publication.

440

## 441 **Acknowledgements**

442 We thank the following collection managers at the MNHN, Paris, for their support during data  
443 acquisition: Alexander Nasole, Aude Lalis, Aurélie Verguin, Céline Bens, Géraldine Veron,  
444 Jacques Cuisin, Joséphine Lesur and Violaine Colin. Creation of datasets accessed on  
445 MorphoSource was made possible by the following funders and grant numbers: NSF DBI-  
446 1701713, 1701714, 1701737, 1702263, 1701665, 1701767, 1701769, 1701870, 1701797,  
447 701851, 1702442, 1902105, BCS 1317525, BCS 1540421, BCS 1552848; ERC-2015-STG-  
448 677774 (TEMPO Mammals project to RB) and Leakey Foundation. Project funding for digital

449 acquisition of each used specimen is detailed in Table S1 of Supporting Information 1. We also  
450 thank Anjali Goswami, Helder Gomes Rodrigues, Eric Guilbert and Loïc Kéver for their  
451 insightful comments during the elaboration of this study. This work was supported by CNPq  
452 doctoral grant to PSR (process #204841/2018-6).

453

#### 454 **Author contributions**

455 Conceptualization: PSR, ACF and AH; data curation: PSR and RB; data acquisition: PSR;  
456 methodology: PSR, ACF, JC and AH; analyses design: PSR and JC; result interpretation: PSR,  
457 ACF, JC, AH; writing original draft: PSR; review and editing: PSR, ACF, RB, AH. All authors  
458 approved the manuscript submission.

459

#### 460 **Competing interests**

461 The authors declare no competing interests.

462

#### 463 **Literature cited**

464 Almécija S, Smaers JB, Jungers WL. 2015. The evolution of human and ape hand proportions.

465 *Nature Communications* **6**. doi:10.1038/ncomms8717

466 Bennett CV, Goswami A. 2013. Statistical support for the hypothesis of developmental constraint  
467 in marsupial skull evolution. *BMC Biology* **11**:1–14. doi:10.1186/1741-7007-11-52

468 Bennett VC, Goswami A. 2011. Does developmental strategy drive limb integration in marsupials  
469 and monotremes? *Mammalian Biology* **76**:79–83. doi:10.1016/j.mambio.2010.01.004

470 Biewener AA, Patek SN. 2003. Movement on land *Animal Locomotion*. Oxford: Oxford  
471 University Press. pp. 61–88.

- 472 Botton-Divet L, Houssaye A, Herrel A, Fabre AC, Cornette R. 2018. Swimmers, diggers,  
473 climbers and more, a study of integration across the mustelids' locomotor apparatus  
474 (Carnivora: Mustelidae). *Evolutionary Biology* **45**:182–195. doi:10.1007/s11692-017-9442-7
- 475 Burgin CJ, Colella JP, Kahn PL, Upham NS. 2018. How many species of mammals are there?  
476 *Journal of Mammalogy* **99**:1–14. doi:10.1093/jmammal/gyx147
- 477 Chen M, Wilson GP. 2015. A multivariate approach to infer locomotor modes in Mesozoic  
478 mammals. *Paleobiology* **21**:280–312. doi:10.5061/dryad.870j3
- 479 Cheverud JM. 1984. Quantitative genetics and developmental constraints on evolution by  
480 selection. *Journal of Theoretical Biology* **110**:155–171. doi:10.1016/s0022-5193(84)80050-8
- 481 Clavel J, Aristide L, Morlon H. 2019. A penalized likelihood framework for high-dimensional  
482 phylogenetic comparative methods and an application to new-world monkeys brain  
483 evolution. *Systematic Biology* **68**:93–116. doi:10.1093/sysbio/syy045
- 484 Clavel J, Escarguel G, Merceron G. 2015. mvMORPH: An R package for fitting multivariate  
485 evolutionary models to morphometric data. *Methods in Ecology and Evolution* **6**:1311–1319.  
486 doi:10.1111/2041-210X.12420
- 487 Clifford AB. 2010. The evolution of the unguligrade manus in artiodactyls. *Journal of Vertebrate*  
488 *Paleontology* **30**:1827–1839. doi:10.1080/02724634.2010.521216
- 489 Cooper KL, Kuang-Hsien Hu J, ten Berge D, Fernandez-Teran M, Ros MA, Tabin CJ. 2011.  
490 Initiation of proximal-distal patterning in the vertebrate limb by signals and growth. *Science*  
491 (1979) **332**:1083–1086. doi:10.1126/science.1199499
- 492 Cooper LN, Berta A, Dawson SD, Reidenberg JS. 2007. Evolution of hyperphalangy and digit  
493 reduction in the cetacean manus. *Anatomical Record* **290**:654–672. doi:10.1002/ar.20532
- 494 Cooper LN, Cretekos CJ, Sears KE. 2012. The evolution and development of mammalian flight.  
495 *Wiley Interdisciplinary Reviews: Developmental Biology* **1**:773–779. doi:10.1002/wdev.50

- 496 Cooper WJ, Steppan SJ. 2010. Developmental constraint on the evolution of marsupial forelimb  
497 morphology. *Australian Journal of Zoology* **58**:1–15. doi:10.1071/ZO09102
- 498 Fabre AC, Bardua C, Bon M, Clavel J, Felice RN, Streicher JW, Bonnel J, Stanley EL, Blackburn  
499 DC, Goswami A. 2020. Metamorphosis shapes cranial diversity and rate of evolution in  
500 salamanders. *Nature Ecology and Evolution* **4**:1129–1140. doi:10.1038/s41559-020-1225-3
- 501 Fabre AC, Cornette R, Goswami A, Peigné S. 2015. Do constraints associated with the locomotor  
502 habitat drive the evolution of forelimb shape? A case study in musteloid carnivorans.  
503 *Journal of Anatomy* **226**:596–610. doi:10.1111/joa.12315
- 504 Fabre AC, Cornette R, Slater G, Argot C, Peigné S, Goswami A, Pouydebat E. 2013. Getting a  
505 grip on the evolution of grasping in musteloid carnivorans: A three-dimensional analysis of  
506 forelimb shape. *Journal of Evolutionary Biology* **26**:1521–1535. doi:10.1111/jeb.12161
- 507 Fabre AC, Dowling C, Miguez RP, Fernandez V, Noirault E, Goswami A. 2021. Functional  
508 constraints during development limit jaw shape evolution in marsupials. *Proceedings of the*  
509 *Royal Society B: Biological Sciences* **288**. doi:10.1098/rspb.2021.0319
- 510 Farnum CE, Tinsley M, Hermanson JW. 2007. Forelimb versus hindlimb skeletal development in  
511 the big brown bat, *Eptesicus fuscus*: Functional divergence is reflected in chondrocytic  
512 performance in autopodial growth plates. *Cells Tissues Organs* **187**:35–47.  
513 doi:10.1159/000109962
- 514 Felice RN, Goswami A. 2018. Developmental origins of mosaic evolution in the avian cranium.  
515 *Proc Natl Acad Sci U S A* **115**:555–560. doi:10.1073/pnas.1716437115
- 516 Felice RN, Randau M, Goswami A. 2018. A fly in a tube: Macroevolutionary expectations for  
517 integrated phenotypes. *Evolution* **72**:2580–2594. doi:10.1111/evo.13608
- 518 Friedman ST, Price SA, Wainwright PC. 2021. The effect of locomotion mode on body shape  
519 evolution in teleost fishes. *Integrative Organismal Biology* **3**. doi:10.1093/iob/obab016



- 520 Galis F, van Alphen JJM, Metz JAJ. 2001. Why five fingers? Evolutionary constraints on digit  
521 numbers. *TRENDS in Ecology & Evolution* **16**. doi:10.1016/S0169-5347(01)02289-3
- 522 Gearty W, McClain CR, Payne JL. 2018. Energetic tradeoffs control the size distribution of  
523 aquatic mammals. *Proc Natl Acad Sci U S A* **115**:4194–4199. doi:10.1073/pnas.1712629115
- 524 Gemmel RT, Veitch C, Nelso J. 2002. Birth in marsupials. *Comparative Biochemistry and*  
525 *Physiology Part B* **131**:621–650. doi:10.1016/S1096-4959(02)00016-7
- 526 Goswami A, Polly PD. 2010. The influence of modularity on cranial morphological disparity in  
527 carnivora and primates (mammalia). *PLoS ONE* **5**. doi:10.1371/journal.pone.0009517
- 528 Goswami A, Smaers JB, Soligo C, Polly PD. 2014. The macroevolutionary consequences of  
529 phenotypic integration: from development to deep time. *Philosophical transactions of the*  
530 *Royal Society Series B, Biological Sciences* **369**:20130254. doi:10.1098/rstb.2013.0254
- 531 Grossnickle DM, Chen M, Wauer JGA, Pevsner SK, Weaver LN, Meng QJ, Liu D, Zhang YG,  
532 Luo ZX. 2020. Incomplete convergence of gliding mammal skeletons. *Evolution* **74**:2662–  
533 2680. doi:10.1111/evo.14094
- 534 Haber A. 2011. A comparative analysis of integration indices. *Evolutionary Biology* **38**:476–488.  
535 doi:10.1007/s11692-011-9137-4
- 536 Hall BK. 2012. Evolutionary developmental biology (Evo-Devo): Past, present, and future.  
537 *Evolution: Education and Outreach* **5**:184–193. doi:10.1007/s12052-012-0418-x
- 538 Hallgrímsson B, Willmore K, Hall BK. 2002. Canalization, developmental stability, and  
539 morphological integration in primate limbs. *Yearbook of Physical Anthropology* **45**:131–158.  
540 doi:10.1002/ajpa.10182
- 541 Hamrick MW. 2001. Development and evolution of the mammalian limb: adaptive diversification  
542 of nails, hooves, and claws. *Evolution & Development* **3**:355–363. doi:10.1046/j.1525-  
543 142x.2001.01032.x

- 544 Hanot P, Herrel A, Guintard C, Cornette R. 2017. Morphological integration in the appendicular  
545 skeleton of two domestic taxa: The horse and donkey. *Proceedings of the Royal Society B:  
546 Biological Sciences* **284**. doi:10.1098/rspb.2017.1241
- 547 Hansen TF. 1997. Stabilizing selection and the comparative analysis of adaptation. *Evolution*  
548 **51**:1341–1351. doi:10.1111/j.1558-5646.1997.tb01457.x
- 549 Hansen TF, Houle D. 2008. Measuring and comparing evolvability and constraint in multivariate  
550 characters. *Journal of Evolutionary Biology* **21**:1201–1219. doi:10.1111/j.1420-  
551 9101.2008.01573.x
- 552 Harmon LJ, Losos JB, Jonathan Davies T, Gillespie RG, Gittleman JL, Bryan Jennings W, Kozak  
553 KH, McPeck MA, Moreno-Roark F, Near TJ, Purvis A, Ricklefs RE, Schluter D, Schulte JA,  
554 Seehausen O, Sidlauskas BL, Torres-Carvajal O, Weir JT, Mooers AT. 2010. Early bursts of  
555 body size and shape evolution are rare in comparative data. *Evolution* **64**:2385–2396.  
556 doi:10.1111/j.1558-5646.2010.01025.x
- 557 Holder N. 1983. Developmental constraints and the evolution of vertebrate digit patterns. *Journal*  
558 *of Theoretical Biology* **104**:451–471. doi:10.1016/0022-5193(83)90117-0
- 559 Howenstine AO, Sadier A, Anthwal N, Lau CL, Sears KE. 2021. Non-model systems in  
560 mammalian forelimb evo-devo. *Genetics and Development* **69**:65–71.  
561 doi:10.1016/j.gde.2021.01.012
- 562 Hunt G. 2012. Measuring rates of phenotypic evolution and the inseparability of tempo and  
563 mode. *Paleobiology* **38**:351–373. doi:10.5061/dryad.c1m60s84
- 564 Janis CM, Martín-Serra A. 2020. Postcranial elements of small mammals as indicators of  
565 locomotion and habitat. *PeerJ* **8**. doi:10.7717/peerj.9634

- 566 Joly S, Lambert F, Alexandre H, Clavel J, Léveillé-Bourret É, Clark JL. 2018. Greater pollination  
567 generalization is not associated with reduced constraints on corolla shape in Antillean plants.  
568 *Evolution* **72**:244–260. doi:10.1111/evo.13410
- 569 Kalinka AT, Tomancak P. 2012. The evolution of early animal embryos: Conservation or  
570 divergence? *Trends in Ecology and Evolution* **27**:385–393. doi:10.1016/j.tree.2012.03.007
- 571 Kavanagh KD, Shoal O, Winslow BB, Alon U, Leary BP, Kan A, Tabin CJ. 2013.  
572 Developmental bias in the evolution of phalanges. *Proceeding of the National Academy of*  
573 *Sciences* **110**:18190–18195. doi:10.1073/pnas.1315213110
- 574 Kelly EM, Sears KE. 2011. Reduced phenotypic covariation in marsupial limbs and the  
575 implications for mammalian evolution. *Biological Journal of the Linnean Society* **102**:22–  
576 36. doi:10.1111/j.1095-8312.2010.01561.x
- 577 Kubo T, Sakamoto M, Meade A, Venditti C. 2019. Transitions between foot postures are  
578 associated with elevated rates of body size evolution in mammals. *Proceedings of the*  
579 *Proceeding of the National Academy of Sciences* **116**:2618–2623.  
580 doi:10.1073/pnas.1814329116
- 581 Lande R. 1979. Quantitative genetic analysis of multivariate evolution, applied to brain: Body  
582 size allometry. *Evolution* **33**:402–416. doi:10.2307/2407630
- 583 Lungmus JK, Angielczyk KD. 2021. Phylogeny, function and ecology in the deep evolutionary  
584 history of the mammalian forelimb. *Proceedings of the Royal Society B: Biological Sciences*  
585 **288**:202104942. doi:10.1098/rspb.2021.0494
- 586 Luo ZX, Meng Q-J, Ji Q, Liu D, Zhang Y-G, Neander AI. 2015. Evolutionary development in  
587 basal mammaliaforms as revealed by a docodontan. *Science (1979)* **347**:760–764.  
588 doi:10.1126/science.1260880

- 589 Machado FA, Hubbe A, Melo D, Porto A, Marroig G. 2019. Measuring the magnitude of  
590 morphological integration: The effect of differences in morphometric representations and the  
591 inclusion of size. *Evolution* **73**:2518–2528. doi:10.1111/evo.13864
- 592 Maier JA, Rivas-Astroza M, Deng J, Dowling A, Oboikovitz P, Cao X, Behringer RR, Cretokos  
593 CJ, Rasweiler JJ, Zhong S, Sears KE. 2017. Transcriptomic insights into the genetic basis of  
594 mammalian limb diversity. *BMC Evolutionary Biology* **17**. doi:10.1186/s12862-017-0902-6
- 595 Marroig G. 2007. When size makes a difference: Allometry, life-history and morphological  
596 evolution of capuchins (*Cebus*) and squirrels (*Saimiri*) monkeys (Cebinae, Platyrrhini).  
597 *BMC Evolutionary Biology* **7**:20-. doi:10.1186/1471-2148-7-20
- 598 Martín-Serra A, Benson RBJ. 2020. Developmental constraints do not influence long-term  
599 phenotypic evolution of marsupial forelimbs as revealed by interspecific disparity and  
600 integration patterns. *American Naturalist* **195**:547–560. doi:10.5061/dryad.900ng75
- 601 Martín-Serra A, Figueirido B, Pérez-Claros JA, Palmqvist P. 2015. Patterns of morphological  
602 integration in the appendicular skeleton of mammalian carnivores. *Evolution* **69**:321–340.  
603 doi:10.1111/evo.12566
- 604 McGrew WC, Marchant LF, Scott SE, Tutin CE. 2001. Intergroup differences in a social custom  
605 of wild chimpanzees: The grooming hand-clasp of the Mahale Mountains. *Current*  
606 *Anthropology* **42**:148–153. doi:10.1086/318441
- 607 McHorse BK, Biewener AA, Pierce SE. 2019. The evolution of a single toe in horses: causes,  
608 consequences, and the way forward *Integrative and Comparative Biology*. Oxford University  
609 Press. pp. 638–655. doi:10.1093/icb/icz050
- 610 Melo D, Garcia G, Hubbe A, Assis AP, Marroig G. 2015. EvolQG - An R package for  
611 evolutionary quantitative genetics. *F1000Res* **4**:925. doi:10.1101/026518

- 612 Naghizadeh M, Mohajerani MH, Whishaw IQ. 2020. Mouse Arm and hand movements in  
613 grooming are reaching movements: Evolution of reaching, handedness, and the thumbnail.  
614 *Behavioural Brain Research* **393**. doi:10.1016/j.bbr.2020.112732
- 615 Pavlicev M, Cheverud JM, Wagner GP. 2009. Measuring morphological integration using  
616 eigenvalue variance. *Evolutionary Biology* **36**:157–170. doi:10.1007/s11692-008-9042-7
- 617 Petit F, Sears KE, Ahituv N. 2017. Limb development: A paradigm of gene regulation. *Nature*  
618 *Reviews Genetics* **18**:245–158. doi:10.1038/nrg.2016.167
- 619 Polly D. 2007. Limbs in mammalian evolution In: Hall BK, editor. *Fins into Limbs: Evolution,*  
620 *Development, and Transformation*. Chicago: The University of Chicago Press. pp. 245–268.
- 621 Prothero DR. 2009. Evolutionary transitions in the fossil record of terrestrial hoofed mammals.  
622 *Evolution: Education and Outreach* **2**:289–302. doi:10.1007/s12052-009-0136-1
- 623 Raff RA. 1996. *The shape of life: genes, development, and the evolution of animal form.*, 1st  
624 Edition. ed. Chicago: University of Chicago Press.
- 625 Randau M, Goswami A. 2017. Unravelling intravertebral integration, modularity and disparity in  
626 Felidae (Mammalia). *Evolution and Development* **19**:85–95. doi:10.1111/ede.12218
- 627 R Core Team. 2021. *R: A language and environment for statistical computing*. R Foundation for  
628 Statistical Computing.
- 629 Rolian C. 2009. Integration and evolvability in primate hands and feet. *Evolutionary Biology*  
630 **36**:100–117. doi:10.1007/s11692-009-9049-8
- 631 Ross D, Marcot JD, Betteridge KJ, Nascone-Yoder N, Scott Bailey C, Sears KE. 2013.  
632 Constraints on mammalian forelimb development: insights from developmental disparity.  
633 *Evolution* **67**:3645–3656. doi:10.5061/dryad.9m59b
- 634 Ruvinsky I, Gibson-Brown JJ. 2000. Genetic and developmental bases of serial homology in  
635 vertebrate limb evolution. *Development* **5244**:5233–5244. doi:10.1242/dev.127.24.5233

- 636 Sánchez-Villagra MR. 2013. Why are there fewer marsupials than placentals? On the relevance  
637 of geography and physiology to evolutionary patterns of mammalian diversity and disparity.  
638 *Journal of Mammalian Evolution*. doi:10.1007/s10914-012-9220-3
- 639 Saxena A, Towers M, Cooper KL. 2017. The origins, scaling and loss of tetrapod digits.  
640 *Philosophical Transactions of the Royal Society B: Biological Sciences* **372**.  
641 doi:10.1098/rstb.2015.0482
- 642 Schliep KP. 2011. phangorn: Phylogenetic analysis in R. *Bioinformatics* **27**:592–593.  
643 doi:10.1093/bioinformatics/btq706
- 644 Schmidt M, Fischer MS. 2009. Morphological integration in Mammalian limb proportions:  
645 dissociation between function and development. *Evolution* **63**:749–776. doi:10.1111/j.1558-  
646 5646.2008.00583.x
- 647 Schneider I, Shubin NH. 2013. The origin of the tetrapod limb: From expeditions to enhancers.  
648 *Trends in Genetics* **29**:419–426. doi:10.1016/j.tig.2013.01.012
- 649 Sears K. 2004. Constraints on the morphological evolution of marsupial shoulder girdles.  
650 *Evolution* **58**:2353. doi:10.1554/03-669
- 651 Sears K, Behringer RR, Rasweiler JJ, Niswander LA. 2007. The evolutionary and developmental  
652 basis of parallel reduction in mammalian zeugopod elements. *The American Naturalist*  
653 **169**:105–117. doi:10.1086/510259
- 654 Sears K, Maier JA, Sadier A, Sorensen D, Urban DJ. 2017. Timing the developmental origins of  
655 mammalian limb diversity. *Genesis* 1–14. doi:10.1002/dvg.23079
- 656 Shubin N, Tabin C, Carroll S. 1997. Fossils, genes and the evolution of animal limbs. *Nature*  
657 **388**:639–648. doi:10.1038/41710

- 658 Stopper GF, Wagner GP. 2005. Of chicken wings and frog legs: A smorgasbord of evolutionary  
659 variation in mechanisms of tetrapod limb development. *Developmental Biology* **288**:21–39.  
660 doi:10.1016/j.ydbio.2005.09.010
- 661 Tanaka M. 2016. Fins into limbs: Autopod acquisition and anterior elements reduction by  
662 modifying gene networks involving 5'Hox, Gli3, and Shh. *Developmental Biology*.  
663 doi:10.1016/j.ydbio.2016.03.007
- 664 Upham NS, Esselstyn JA, Jetz W. 2019. Inferring the mammal tree: Species-level sets of  
665 phylogenies for questions in ecology, evolution, and conservation. *PLoS Biology* **17**.  
666 doi:10.1371/journal.pbio.3000494
- 667 Wagner GP. 1988. The influence of variation and of developmental constraints on the rate of  
668 multivariate phenotypic evolution. *Journal of Evolutionary Biology* **1**:45–66.  
669 doi:10.1046/j.1420-9101.1988.1010045.x
- 670 Wang X. 1993. Transformation from plantigrady to digitigrady: Functional morphology of  
671 locomotion in Hesperocyon (Canidae: Camivora). *American Museum Novitates* **3069**:1–23.
- 672 Watson RA, Wagner GP, Pavlicev M, Weinreich DM, Mills R. 2014. The evolution of phenotypic  
673 correlations and “developmental memory.” *Evolution* **68**:1124–1138. doi:10.1111/evo.12337
- 674 Weaver LN, Grossnickle DM. 2020. Functional diversity of small-mammal postcrania is linked to  
675 both substrate preference and body size. *Current Zoology* **66**:539–553.  
676 doi:10.1093/cz/zoaa057
- 677 Weisbecker V, Schmid S. 2007. Autopodial skeletal diversity in hystricognath rodents: Functional  
678 and phylogenetic aspects. *Mammalian Biology* **72**:27–44.  
679 doi:10.1016/j.mambio.2006.03.005

- 680 Weisbecker V, Warton DI. 2006. Evidence at hand: Diversity, functional implications, and  
681 locomotor prediction in intrinsic hand proportions of diprotodontian marsupials. *Journal of*  
682 *Morphology* **267**:1469–1485. doi:10.1002/jmor.10495
- 683 Young NM, Hallgrímsson B. 2005. Serial homology and the evolution of mammalian limb  
684 covariation structure. *Evolution* **59**:2691–2704. doi:10.1111/j.0014-3820.2005.tb00980.x
- 685 Young NM, Winslow B, Takkellapati S, Kavanagh K. 2015. Shared rules of development predict  
686 patterns of evolution in vertebrate segmentation. *Nature Communications* **6**.  
687 doi:10.1038/ncomms7690
- 688



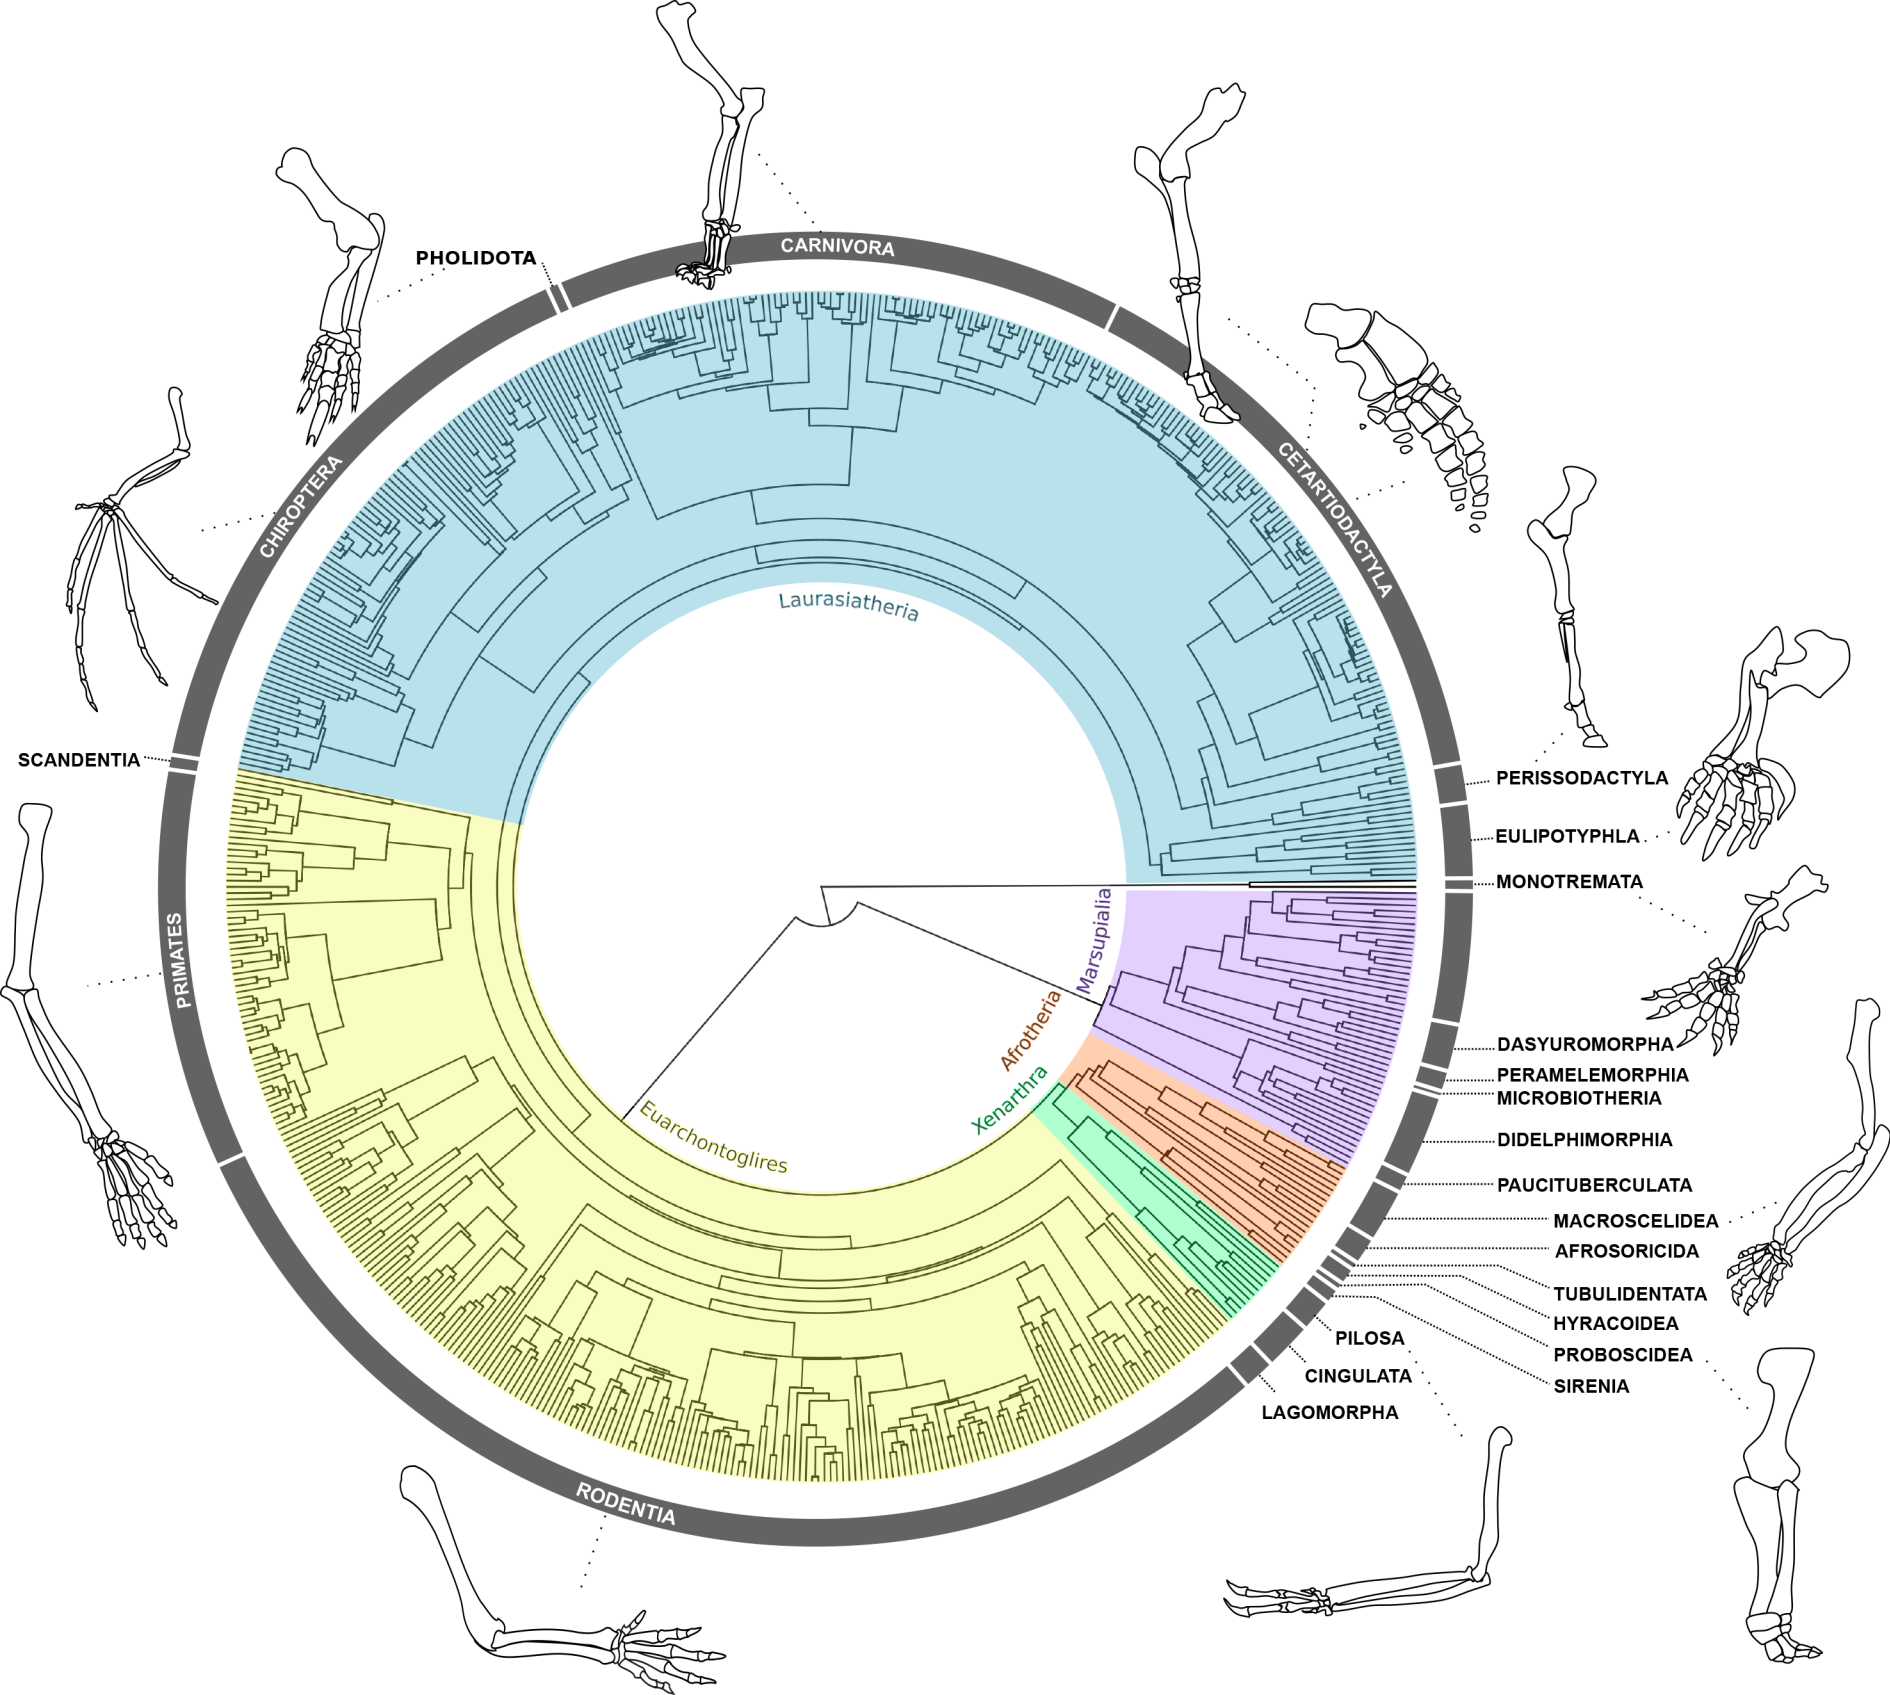

**A**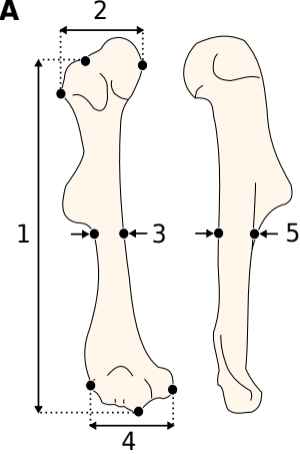**B**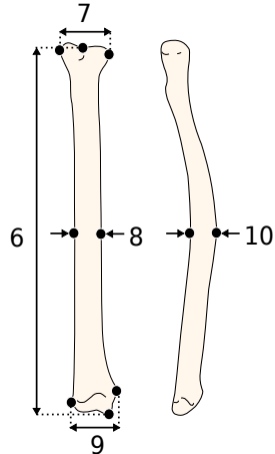**C**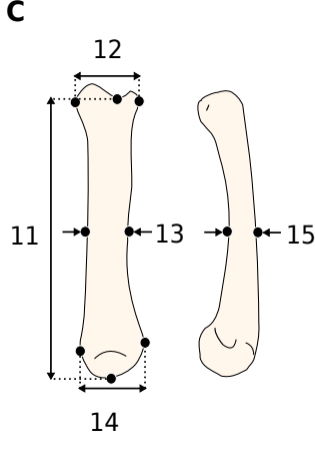**D**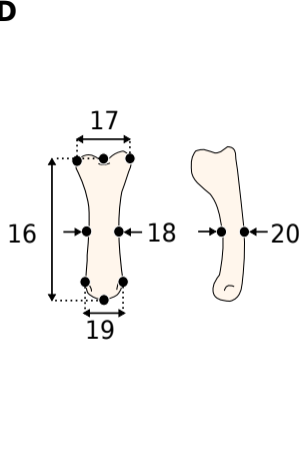

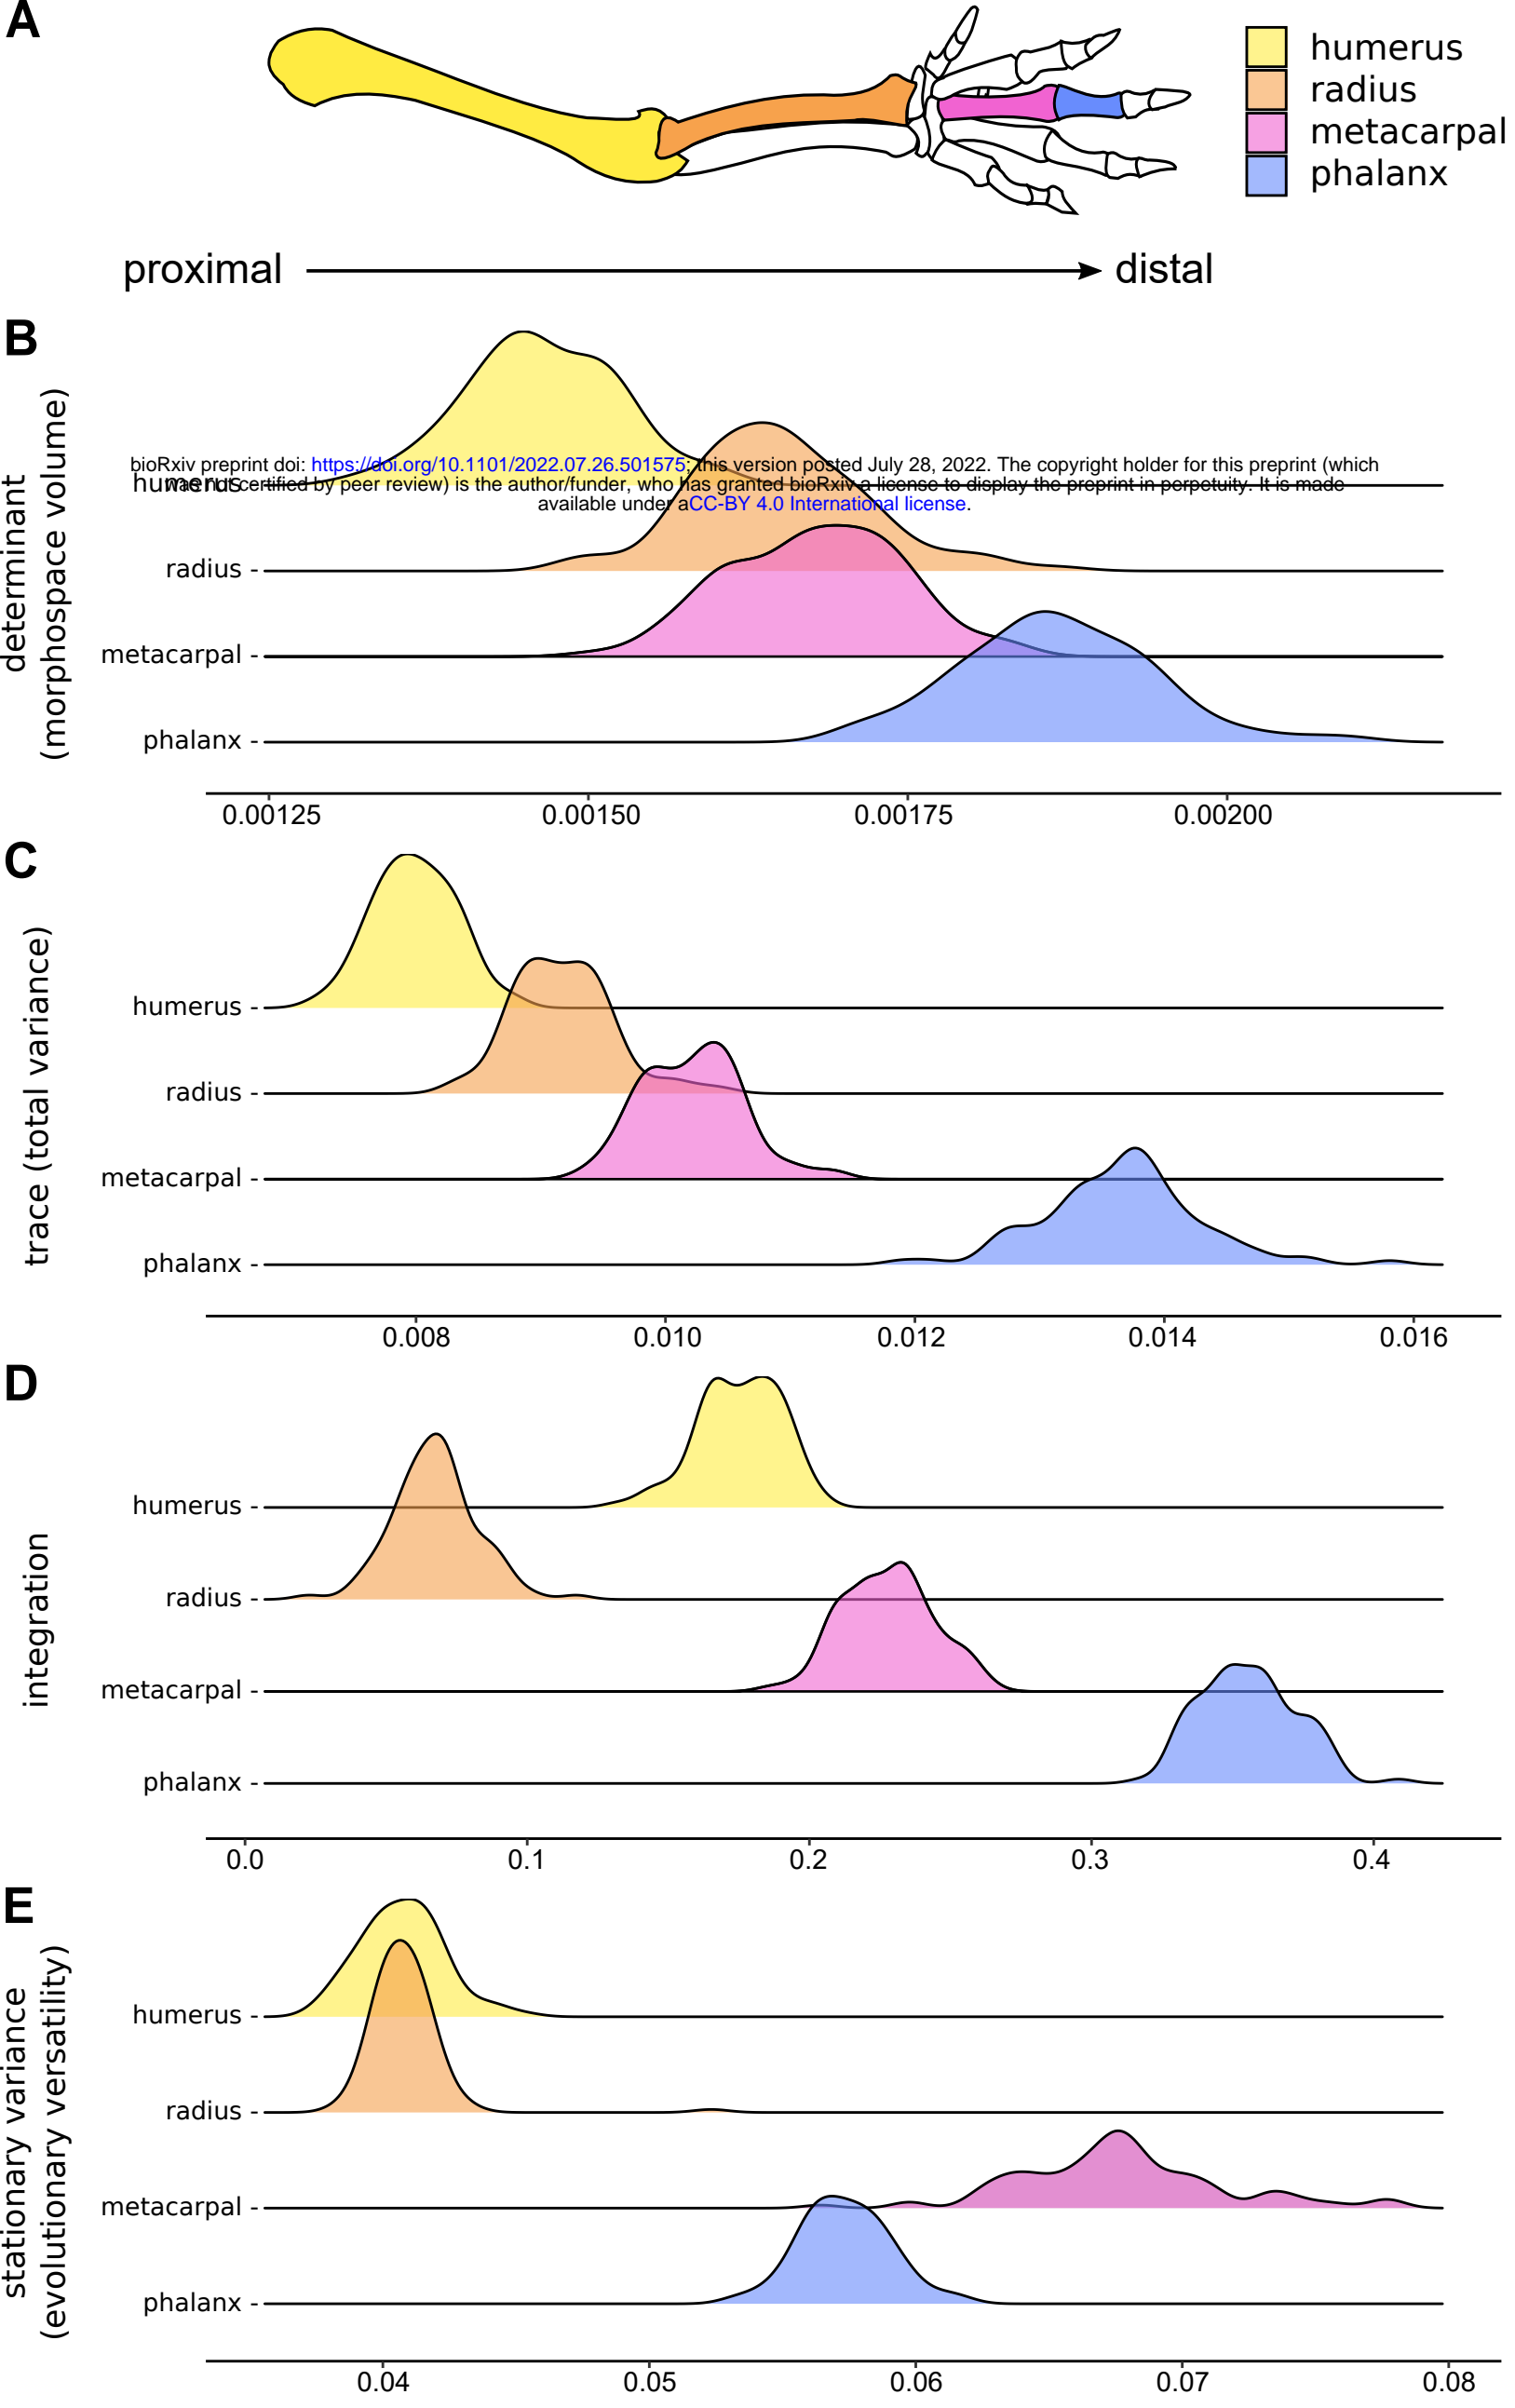

Source: https://www.biorxiv.org/content/10.1101/2022.07.26.501575v1.full.pdf
